# Supplementary material
Source: PubMed Central journal article supplement (PMC2394906)
Supplement: supp_74_9_2902__1.pdf [file supp_74_9_2902__1.pdf]

Fig. S1

a) Relationship between vegetation cover and DNA yields ( $\mu\text{g g}^{-1}$  soil dry weight) by the tested methods. Box diagram of medians and respective quartiles. Abbreviations stand for DNA extraction methods (see Materials and Methods).

b) Correlation between DNA yields ( $\mu\text{g g}^{-1}$  soil dry weight) and numbers of bacteria (per g soil dry weight) separately in soils of low (<20%; full line) and high (>20%; dashed line) clay content. Averages of three DNA yields over one method are given.

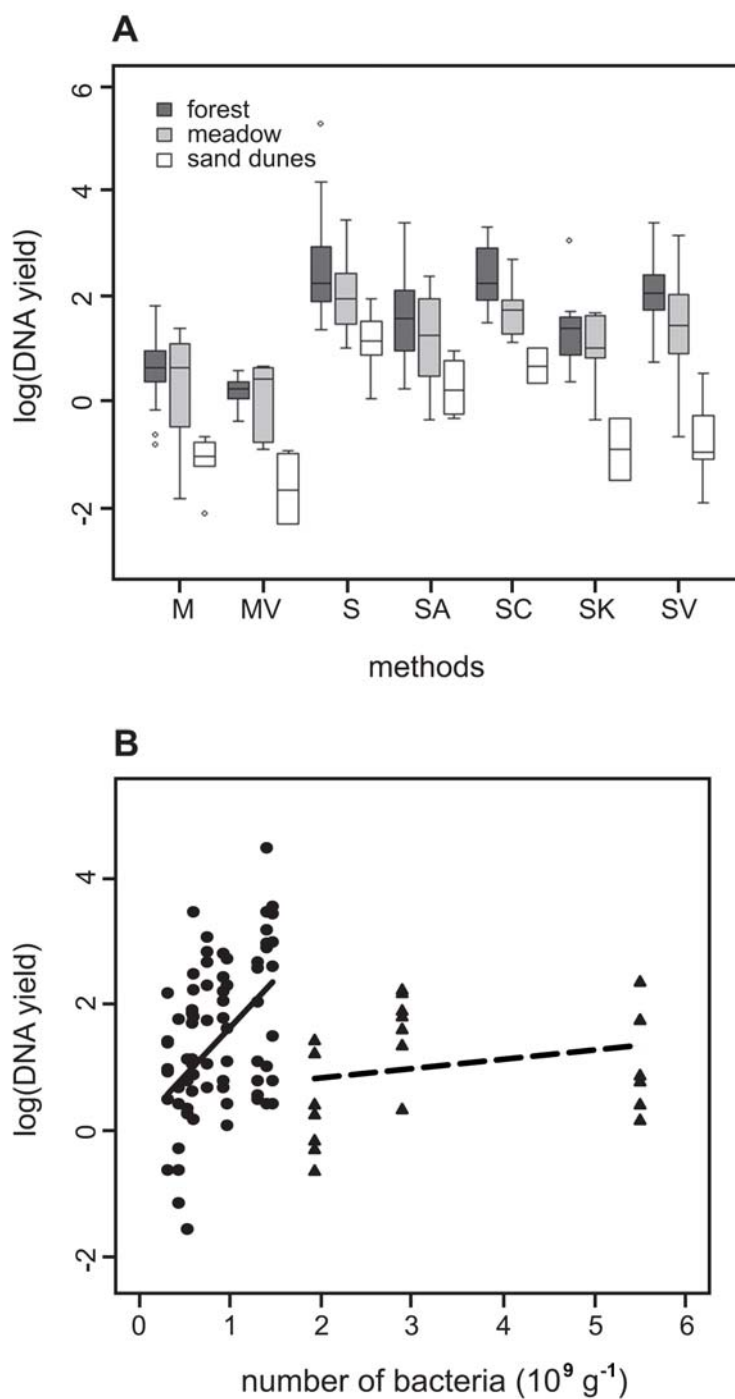

Table S1

DNA yield averages ( $\mu\text{g g}^{-1}$ ) and respective standard deviations (in the brackets) of three measurements. Abbreviations stand for DNA extraction methods (see Materials and Methods).

| Vegetation type             | Clay content | DNA yield [ $\mu\text{g.g}^{-1}$ ] |           |             |             |            |            |            |
|-----------------------------|--------------|------------------------------------|-----------|-------------|-------------|------------|------------|------------|
|                             |              | M                                  | MV        | S           | SA          | SC         | SK         | SV         |
| <b>Forest</b>               |              |                                    |           |             |             |            |            |            |
| Alpilles                    |              | 2.0 (0.5)                          | 1.4 (0.4) | 29.9 (24.5) | 17.2 (9.0)  | 26.7 (7.0) | 4.0 (2.0)  | 11.8 (1.5) |
| Kotyz                       |              | 2.5 (0.6)                          | 1.4 (0.2) | 74.2 (83.8) | 16.9 (12.5) | 27.5 (6.5) | 20.8 (8.1) | 15.8 (9.4) |
| Meluzina                    |              | 2.0 (0.7)                          | 1.6 (0.1) | 11.5 (6.0)  | 2.7 (0.1)   | 12.6 (8.1) | 1.5 (0.4)  | 6.8 (0.7)  |
| Nechranice                  | > 20 %       | 1.4 (0.6)                          | 1.1 (0)   | 5.2 (1.1)   | 2.0 (0.7)   | 9.4 (3.8)  | 2.2 (1.2)  | 5.2 (0.9)  |
| Podyji                      |              | 2.2 (1.2)                          | 1.1 (0.3) | 27.5 (21.0) | 8.2 (2.8)   | 5.4 (1.2)  | 2.7 (1.4)  | 10.5 (1)   |
| Srbsko                      | > 20 %       | 3.5 (1.9)                          | 1.3 (0)   | 7.9 (1.1)   | 6.0 (0.5)   | 4.5 (1.0)  | 5.5 (2.3)  | 8.3 (2.3)  |
| Trebon                      |              | 1.4 (1.0)                          | 1.0 (0.3) | 13.3 (5.9)  | 2.7 (0.2)   | 8.8 (1.4)  | 4.5 (2.1)  | 8.8 (1.6)  |
| <b>Meadow</b>               |              |                                    |           |             |             |            |            |            |
| Bozi Dar                    |              | 1.5 (1.8)                          | 0.5 (0.1) | 7.8 (2.7)   | 2.4 (0.4)   | 3.6 (1.4)  | 2.3 (1.3)  | 3.7 (0.9)  |
| Devin                       |              | 2.6 (0.9)                          | 1.8 (0.2) | 18.6 (9.3)  | 8.8 (1.8)   | 14.8 (2.1) | 5.1 (1.5)  | 12.6 (2.0) |
| Oblik                       |              | 2.2 (0.9)                          | 1.7 (0.2) | 6.0 (3.7)   | 2.6 (1.9)   | 5.7 (3.2)  | 2.8 (0.2)  | 4.9 (1.0)  |
| Rynholec                    | > 20 %       | 1.2 (1.0)                          | 0.5 (0)   | 3.8 (0.8)   | 1.4 (0.2)   | 3.1 (1.2)  | 0.7 (0.1)  | 0.8 (0.3)  |
| Slanisko Nesyt              |              | 2.0 (1.2)                          | 1.8 (0.1) | 10.0 (2.4)  | 8.0 (1.3)   | 6.9 (2.3)  | 5.3 (1.9)  | 14.4 (2.2) |
| <b>Scattered vegetation</b> |              |                                    |           |             |             |            |            |            |
| Saline Giraud               |              | 0.5 (0.1)                          | 0.3 (0.2) | 5.2 (1.3)   | 1.8 (0.9)   | 1.4 (0.7)  | 0.7 (0.1)  | 0.3 (0.3)  |
| Slepici vrch                |              | 0.2 (0.1)                          | 0.2 (0.1) | 2.0 (0.7)   | 1.3 (0.5)   | 2.8 (0.3)  | 0.2 (0.1)  | 1.2 (0.1)  |

Table S2

The number of T-RF lengths detected at three sites according to the tested methods.

Abbreviations stand for DNA extraction methods (see Materials and Methods).

|                      | M  | MV | S  | SA | SC | SK | SV |
|----------------------|----|----|----|----|----|----|----|
| <i>eubacteria</i>    |    |    |    |    |    |    |    |
| Oblik                | 38 | 43 | 37 | 43 | 43 | 53 | 54 |
| Saline de Giraud     | 16 | 26 | 20 | 35 | 31 | 32 | 13 |
| Srbsko               | 27 | 38 | 41 | 44 | 49 | 37 | 43 |
| <i>actinomycetes</i> |    |    |    |    |    |    |    |
| Oblik                | 31 | 36 | 38 | 33 | 27 | 38 | 34 |
| Saline de Giraud     | 23 | 15 | 35 | 24 | 22 | 37 | 20 |
| Srbsko               | 33 | 35 | 31 | 33 | 39 | 46 | 39 |
